# Supplementary material for: Lack of Fe(II) transporters in basal Cyanobacteria complicates iron uptake in ferruginous Archean oceans
Source: bioRxiv or medRxiv preprint supplement (doi:10.1101/2021.11.08.467730), 2021-11-08
Supplement: Supplementary file [file media-2.pdf]

# Lack of Fe(II) transporters in basal Cyanobacteria complicates iron uptake in ferruginous Archean oceans.

## Supplementary Tables

Tristan C. Enzingmüller-Bleyl<sup>1§</sup>, Joanne Boden<sup>2§</sup>, Achim J. Herrmann<sup>1</sup>, Katharina W. Ebel<sup>1</sup>, Patricia Sanchez-Baracaldo<sup>2</sup>, Nicole Frankenberg-Dinkel<sup>1</sup>, Michelle M. Gehringer<sup>1\*</sup>

<sup>1</sup>Department of Microbiology, Technical University of Kaiserslautern, Kaiserslautern, 67663, Germany.

<sup>2</sup> School of Geographical Sciences, Faculty of Science, University of Bristol, Bristol, BS8 1SS, United Kingdom.

<sup>§</sup>These authors contributed equally to the manuscript.

\*mmgehringer@yahoo.com, mgehring@bio.uni-kl.de

Keywords: Iron uptake, Cyanobacteria, *Pseudanabaena* sp. PCC7367, Archean, evolutionary dating

## Supplementary tables

**Supplementary table 1: Iron associated transporters identified in *Pseudanabaena* sp. PCC7367.** The master genes (Column Master Gene ORF number) used in similarity searches were primarily obtained from *Synechocystis* PCC6803 (NC\_000911.1) in column 'Master Gene Organism', as many publications have targeted specific iron transporters for characterisation in this species. If a similar gene was identified in *Pseudanabaena* sp. PCC7367, it is indicated with a '+' with the relative genomic open reading frame (ORF) number in the following column and the BLAST Expect value in the last column. Specifically, the following iron transporter sequences from *Synechocystis* sp. PCC6803 were used to identify homologues in *Pseudanabaena* sp. PCC7367: cyanobacterial FTR1 (Katoh *et al.* 2000), FutABC (Brandt *et al.* 2009; Katoh *et al.* 2001), FeoABC (Katoh *et al.* 2001; Kranzler *et al.* 2014) and ExbB/D TonB (Qiu *et al.* 2018; Jiang *et al.*, 2015). Genes from other Cyanobacterial species encoding the divalent metal uptake transporters classified as ZIPs (zinc-iron permeases) (Morrissey & Bowler, 2012) or similar to NRAMPs (natural resistance associated macrophage proteins) (Nevo & Nelson 2006) were used as master genes for similarity searches in *Pseudanabaena* sp. PCC 7367 (NC\_019701.1), namely *Chroococcidiopsis thermalis* PCC 7203 (NC\_019695.1); *Synechococcus* sp. PCC7335 (NZ\_DS989904.1); *Cyanobium gracile* PCC6307 (NC\_019675.1), *Prochlorococcus marinus* str. AS9601 (NC\_008816.1) and *Calothrix* sp. PCC7507 (NC\_019682.1). For the identification of the qPCR-reference gene encoding the DNA polymerase III subunit gamma/tau (*rpoC1*) an additional master gene from *Chroococcidiopsis thermalis* PCC7203 was included, since it resulted in a more stringent expect value of 0.0 while the sequence from *Synechocystis* PCC6803 resulted in a hit with an expect value of 1e-110. Three amino acid sequences for subdomains of the FeoB Fe(II) transporter of *Synechocystis* PCC6803 were obtained from the KEGG genome (Kanehisa *et al.*, 2016; Kanehisa & Goto, 2000) accessible at <https://www.genome.jp/kegg>, and these sequences are marked with 'K'. The subdomains of FeoB are: CFeoB, or the C-domain, covering amino acids 405 to 456; GFeoB, or gate domain, from amino acids 300 to 392 and 464 to 582; the NFeoB or N-domain, spanning amino acids 21 to 173 (KEGG genome). The protein sequences encoded by the master genes were used for the BLASTp (Altschul 1991; Altschul 1993; Zhang *et al.*, 2000) protein similarity search against the proteome of *Pseudanabaena* sp. PCC7367 (NC\_019701.1).

| Gene         | Master Gene Organism                              | Master Gene ORF number | <i>Pseudanabaena</i> sp. PCC7367 | ORF number                                 | Expect Value      |
|--------------|---------------------------------------------------|------------------------|----------------------------------|--------------------------------------------|-------------------|
| <i>cftr1</i> | <i>Synechococcus</i> PCC6803                      | SGL_RS03385            | +                                | PSE7367_<br>RS12485                        | 1E <sup>-71</sup> |
| <i>fur</i>   | <i>Synechococcus</i> PCC6803                      | SGL_RS18290            | +                                | PSE7367_<br>RS06445                        | 7E <sup>-63</sup> |
| <i>futB</i>  | <i>Synechococcus</i> PCC6803                      | SGL_RS12585            | +                                | PSE7367_<br>RS05695                        | 0                 |
|              |                                                   |                        | +                                | Pse7367_<br>1153<br>(annotation in INDSEC) | 0                 |
| <i>feoB</i>  | <i>Synechocystis</i> sp. PCC6803<br>substr. PCC-P | SGL_RS05125            | -                                | /                                          | /                 |
| <i>CfeoB</i> | <i>Synechocystis</i> PCC6803                      | KEGG                   | -                                | /                                          | /                 |
| <i>GfeoB</i> | <i>Synechocystis</i> PCC6803                      | KEGG                   | -                                | /                                          | /                 |
| <i>NfeoB</i> | <i>Synechocystis</i> PCC6803                      | KEGG                   | -                                | /                                          | /                 |
| <i>ZIP</i>   | <i>Chroococidiopsis thermalis</i><br>PCC7203      | CHRO_RS27220           | -                                | /                                          | /                 |
| <i>ZIP</i>   | <i>Synechococcus</i> sp. PCC7335                  | S7335_RS13260          | -                                | /                                          | /                 |
| <i>NRAMP</i> | <i>Cyanobium gracile</i><br>PCC6307               | CYAGR_RS15885          | -                                | /                                          | /                 |
| <i>NRAMP</i> | <i>Prochlorococcus marinus</i><br>str. AS9601     | A9601_RS15195          | -                                | /                                          | /                 |

| Gene                            | Master Gene Organism                         | Master Gene ORF number | <i>Pseudanabaena</i> sp. PCC7367 | ORF number          | Expect Value       |
|---------------------------------|----------------------------------------------|------------------------|----------------------------------|---------------------|--------------------|
| <i>NRAMP</i><br>( <i>mtnH</i> ) | <i>Calothrix</i> sp. PCC7507                 | CAL7507_RS2150<br>0    | -                                | /                   | /                  |
| <i>rpoC1</i>                    | <i>Synechocystis</i> PCC6803                 | SGL_RS06875            | +                                | PSE7367_<br>RS07505 | 1E <sup>-110</sup> |
| <i>rpoC1</i>                    | <i>Chroococidiopsis thermalis</i><br>PCC7203 | CHRO_RS23925           | +                                | PSE7367_<br>RS07505 | 0                  |
| <i>exbB</i>                     | <i>Synechocystis</i> PCC6803                 | SGL_RS02000            | +                                | PSE7367_<br>RS16055 | 1E <sup>-78</sup>  |
|                                 |                                              |                        | +                                | PSE7367_<br>RS01060 | 4E <sup>-28</sup>  |
| <i>exbB</i>                     | <i>Synechocystis</i> PCC6803                 | SGL_RS03845            | +                                | PSE7367_<br>RS01060 | 8E <sup>-52</sup>  |
|                                 |                                              |                        | +                                | PSE7367_<br>RS16055 | 3E <sup>-39</sup>  |
| <i>exbB</i>                     | <i>Synechocystis</i> PCC6803                 | SGL_RS15490            | +                                | PSE7367_<br>RS01060 | 3E <sup>-47</sup>  |
|                                 |                                              |                        | +                                | PSE7367_<br>RS16055 | 8E <sup>-39</sup>  |

| Gene                    | Master Gene Organism             | Master Gene ORF number | <i>Pseudanabaena</i> sp. PCC7367 | ORF number          | Expect Value       |
|-------------------------|----------------------------------|------------------------|----------------------------------|---------------------|--------------------|
| <i>exbD</i>             | <i>Synechocystis</i> PCC6803     | SGL_RS01995            | +                                | PSE7367_<br>RS16060 | 1E <sup>-34</sup>  |
|                         |                                  |                        | +                                | PSE7367_<br>RS17165 | 3E <sup>-19</sup>  |
| <i>exbD</i>             | <i>Synechocystis</i> PCC6803     | SGL_RS03850            | +                                | PSE7367_<br>RS17165 | 2E <sup>-21</sup>  |
|                         |                                  |                        | +                                | PSE7367_<br>RS16060 | 3E <sup>-18</sup>  |
| <i>tonB</i>             | <i>Synechocystis</i> PCC6803     | SGL_RS02005            | -                                | /                   | /                  |
| <i>tonB</i>             | <i>Synechocystis</i> PCC6803     | SGL_RS14560            | -                                | /                   | /                  |
| TBDT<br>( <i>fhuA</i> ) | <i>Synechococcus</i> sp. PCC7002 | SYNPCC7002_RS1<br>5715 | +                                | PSE7367_<br>RS16045 | 2E <sup>-149</sup> |
|                         |                                  |                        | +                                | PSE7367_<br>RS16090 | 2E <sup>-137</sup> |
| TBDT<br>( <i>iutA</i> ) | <i>Synechocystis</i> PCC6803     | SGL_RS01950            | +                                | PSE7367_<br>RS16090 | 2E <sup>-28</sup>  |
|                         |                                  |                        | +                                | PSE7367_<br>RS16045 | 3E <sup>-26</sup>  |
|                         | <i>Synechocystis</i> PCC6803     | SGL_RS01975            | +                                | PSE7367_<br>RS16045 | 0                  |

| Gene                         | Master Gene Organism         | Master Gene ORF number | <i>Pseudanabaena</i> sp. PCC7367 | ORF number          | Expect Value |
|------------------------------|------------------------------|------------------------|----------------------------------|---------------------|--------------|
| TBDT<br>( <i>fhuE/fhuA</i> ) |                              |                        | +                                | PSE7367_<br>RS16090 | 0            |
| TBDT<br>( <i>fhuA</i> )      | <i>Synechocystis</i> PCC6803 | SGL_RS02025            | +                                | PSE7367_<br>RS16045 | 0            |
|                              |                              |                        | +                                | PSE7367_<br>RS16090 | 0            |
| FhuB                         | <i>Nostoc</i> sp. PCC7120    | all0387                | +                                | PSE7367_<br>RS16070 | 2E-71        |
|                              |                              |                        | +                                | PSE7367_<br>RS16065 | 8E-47        |
| FecC                         | <i>Synechocystis</i> PCC6803 | SGL_RS01930            | +                                | PSE7367_<br>RS16065 | 1E-116       |
|                              |                              |                        | +                                | PSE7367_<br>RS16070 | 6E-55        |
| FecD                         | <i>Synechocystis</i> PCC6803 | SGL_RS01935            | +                                | PSE7367_<br>RS16070 | 8E-123       |
|                              |                              |                        | +                                | PSE7367_<br>RS16065 | 2E-56        |

**Supplementary table 2: Iron transporters and related genes identified in Cyanobacteria.** The master genes used to screen for the presence of iron transporters in *Pseudanabaena* sp. PCC7367, listed in Supplementary Table 1 above, were used in protein similarity searches against 125 select Cyanobacterial proteomes. BLASTp was executed using standard algorithm settings and an e-value cut-off of 0,001 (Altschul 1991; Altschul 1993; Zhang et al. 2000). BLASTp hits were additionally validated by comparing query length, cover and identity as well as additional available information such as description of protein function and conserved domains. If a BLAST hit had greatly different query length (>~40%), different cover and identity (compare 40% cover and 10% cover) as well as a description indicating a different protein function (compare FutB iron uptake protein and ABC-Type Ammino Acid transporter) it was judged as invalid and excluded. A plus indicates that the protein is encoded, the absence is marked with a minus sign. When the gene for the protein was not identified by BLASTp, but identified with FeGenie (Garber et al. 2020) this is indicated by 'F'. In the basal clade cyanobacterium *Acaryochloris* sp. CCME5410 both BLASTp and FeGenie indicate that FeoB is absent, however, the KEGG genome lists a FeoB gene for this cyanobacterium, this is indicated with a 'K'. The putative ZIP protein of *Synechococcus* sp. PCC7336 was labelled with (+) as it was detected as a hypothetical protein at the cut-off value by only one of the query sequences. The first 16 rows in bold text, represent the basal clade species as presented in Figure 2B. The remaining species are listed alphabetically. The data file used to generate this table, with all cut-off values is available at [https://osf.io/7x598/?view\\_only=715cd38c378446ba8c3f6c924f9be9f5](https://osf.io/7x598/?view_only=715cd38c378446ba8c3f6c924f9be9f5). The percent identity to the query sequence, E-Value and accession length are listed for the best hit in the data column labelled 'Protein ID'. The 'Non-Redundant ORFs' refer to distinct sequences in a single genome assembly. Partial sequences and subdomains within a full-length sequence are not counted separately.

| Organism                                     | cFTR1 | Fur | FutA1 | FutA2 | FutB | FutC | FeoA | FeoB | FeoC | ZIP | NRAMP | ExbBD | TonB | TBDT |
|----------------------------------------------|-------|-----|-------|-------|------|------|------|------|------|-----|-------|-------|------|------|
| <i>Gloeobacter violaceus</i> PCC 7421        | +     | +   | +     | +     | +    | +    | -    | -    | -    | +   | -     | +     | -    | +    |
| <i>Gloeobacter kilaueaensis</i>              | +     | +   | -     | -     | -    | +    | -    | -    | -    | -   | +     | +     | -    | +    |
| <i>Synechococcus</i> sp. PCC 7336            | +     | +   | +     | +     | +    | +    | -    | -    | -    | (+) | -     | +     | -    | +    |
| <i>Synechococcus</i> sp. JA-3-3Ab            | -     | +   | +     | +     | +    | +    | -    | -    | -    | +   | -     | +     | -    | +    |
| <i>Synechococcus</i> sp. JA-2-3B'a (prime a) | -     | +   | +     | +     | +    | +    | -    | -    | -    | +   | -     | +     | -    | +    |
| <i>Pseudanabaena</i> sp. PCC7367             | +     | +   | +     | +     | +    | +    | -    | -    | -    | -   | -     | +     | -    | +    |
| <i>Pseudanabaena</i> sp. PCC 6802            | +     | +   | -     | -     | -    | +    | -    | -    | -    | -   | +     | +     | -    | -    |
| <i>Synechococcus</i> sp. PCC 7502            | +     | +   | +     | +     | +    | +    | -    | -    | -    | -   | -     | +     | -    | -    |
| <i>Pseudanabaena</i> sp. BC1403              | +     | +   | -     | -     | -    | +    | -    | -    | -    | -   | -     | +     | +    | +    |
| <i>Pseudanabaena biceps</i> PCC 7429         | +     | +   | -     | -     | -    | +    | -    | -    | -    | -   | +     | +     | -    | +    |
| <i>Gloeomargarita lithophora</i>             | +     | +   | +     | +     | +    | +    | -    | -    | -    | -   | -     | +     | -    | -    |



|                                             |   |   |   |   |   |   |   |   |   |   |   |   |   |   |
|---------------------------------------------|---|---|---|---|---|---|---|---|---|---|---|---|---|---|
| <i>Acaryochloris marina</i> MBIC11017       | + | + | + | + | + | + | - | + | - | + | - | + | - | + |
| <i>Acaryochloris</i> sp.<br>CCMEE5410       | + | + | + | + | + | + | - | + | - | + | - | + | - | + |
| <i>Cyanothece</i> sp.<br>PCC 7425           | + | + | + | + | + | + | + | + | - | - | - | + | - | + |
| <i>Thermosynechococcus elongatus</i> BP-1   | - | + | + | + | + | + | - | + | - | - | - | + | - | + |
| <i>Synechococcus</i> sp.<br>PCC 6312        | - | + | + | + | + | + | + | + | - | - | + | + | - | + |
| <i>Aphanothece sacrum</i>                   | + | + | + | + | + | + | - | + | - | - | + | + | + | - |
| <i>Arthrospira maxima</i> CS-328            | - | + | + | + | + | + | - | + | - | - | - | + | - | - |
| <i>Arthrospira platensis</i> str.<br>Paraca | - | + | + | + | + | + | F | + | - | - | - | + | - | - |
| <i>Calothrix</i> PCC7103                    | + | + | - | - | - | + | + | + | - | - | - | + | - | + |
| <i>Calothrix</i> sp. 336/3                  | + | + | - | - | - | + | - | - | - | - | - | + | + | + |
| <i>Chamaesiphon minutus</i> PCC 6605        | + | + | - | - | - | + | - | - | - | - | + | + | - | + |
| <i>Chlorogloeopsis fritschii</i> PCC6912    | + | + | + | + | + | + | + | + | - | + | - | + | - | + |

|                                            |   |   |   |   |   |   |          |   |   |   |   |   |   |   |
|--------------------------------------------|---|---|---|---|---|---|----------|---|---|---|---|---|---|---|
| <i>Chroococidiopsis thermalis</i> PCC 7203 | + | + | + | + | + | + | -        | + | - | + | + | + | - | + |
| <i>Crocospaera watsonii</i> WH 0003        | - | + | + | + | + | + | <b>F</b> | + | - | - | - | + | + | + |
| <i>Crocospaera watsonii</i> WH8501         | - | + | + | + | + | + | <b>F</b> | + | - | - | - | + | + | + |
| <i>Cyanobacterium aponinum</i> PCC 10605   | + | + | + | + | + | + | +        | + | - | - | - | + | + | + |
| <i>Cyanobacterium stanieri</i> PCC 7202    | - | + | + | + | + | + | +        | + | - | - | + | + | + | + |
| <i>Cyanobium gracile</i> PCC 6307          | - | + | + | + | + | + | <b>F</b> | + | - | - | + | + | - | - |
| <i>Cyanobium</i> sp. PCC 7001              | - | + | + | + | + | + | <b>F</b> | + | - | - | - | - | - | - |
| <i>Cyanothece</i> sp. ATCC 51142           | + | + | + | + | + | + | +        | + | - | - | - | + | + | + |
| <i>Cyanothece</i> sp. ATCC 51472           | + | + | + | + | + | + | +        | + | - | - | - | + | + | + |
| <i>Cyanothece</i> sp. PCC 7424             | + | + | + | + | + | + | <b>F</b> | + | - | + | - | + | + | + |
| <i>Cyanothece</i> sp. PCC 8801             | + | + | + | + | + | + | <b>F</b> | + | - | - | - | + | + | + |

|                                                        |   |   |   |   |   |   |          |   |   |   |   |   |   |   |
|--------------------------------------------------------|---|---|---|---|---|---|----------|---|---|---|---|---|---|---|
| <i>Cyanothece</i> sp. PCC<br>8802                      | + | + | + | + | + | + | <b>F</b> | + | - | - | - | + | + | + |
| <i>Cylindrospermopsis</i><br><i>raciborskii</i> CS-505 | + | + | - | - | - | + | -        | - | - | - | - | + | - | - |
| <i>Cylindrospermum</i><br><i>stagnale</i> PCC7417      | + | + | - | - | - | + | -        | - | - | - | + | + | - | + |
| <i>Dactylococcopsis</i><br><i>salina</i> PCC 8305      | - | + | + | + | + | + | <b>F</b> | + | - | - | + | - | - | - |
| <i>Desertifilum</i> sp.<br>IPPAS B-1220                | + | + | + | + | + | + | <b>F</b> | + | - | + | + | + | - | + |
| <i>Fischerella</i><br><i>musci</i> CCME<br>5323        | + | + | - | - | - | + | -        | - | - | + | - | + | + | + |
| <i>Fischerella</i> sp. JSC-<br>11                      | + | + | - | - | - | + | +        | + | - | - | + | + | + | + |
| <i>Fischerella</i> sp. PCC<br>9339                     | + | + | - | - | - | + | +        | + | - | - | + | + | + | + |
| <i>Fischerella</i> sp. PCC<br>9605                     | + | + | - | - | - | + | +        | + | - | + | - | + | + | + |
| <i>Geitlerinema</i> sp.<br>PCC 7105                    | + | + | + | + | + | + | <b>F</b> | + | - | + | - | + | - | + |
| <i>Geminocystis</i><br><i>herdmanii</i> PCC<br>6308    | + | + | + | + | + | + | -        | + | - | - | - | + | + | + |

|                                                |   |   |   |   |   |   |          |   |   |   |   |   |   |   |
|------------------------------------------------|---|---|---|---|---|---|----------|---|---|---|---|---|---|---|
| <i>Gloeocapsa</i> sp. PCC<br>7428              | + | + | + | + | + | + | -        | - | - | + | - | + | + | + |
| <i>Halothece</i> sp. PCC<br>7418               | - | + | + | + | + | + | <b>F</b> | + | - | - | - | + | - | + |
| <i>Leptolyngbya</i><br><i>boryana</i> PCC 6306 | + | + | + | + | + | + | <b>F</b> | - | - | + | - | + | + | + |
| <i>Leptolyngbya</i> sp.<br>BC1307              | + | + | + | + | + | + | -        | - | - | - | + | + | - | + |
| <i>Leptolyngbya</i> sp.<br>PCC 6406            | + | + | + | + | + | + | <b>F</b> | + | - | - | - | + | - | + |
| <i>Leptolyngbya</i> sp.<br>PCC 7375            | + | + | + | + | + | + | +        | + | - | + | - | + | + | + |
| <i>Leptolyngbya</i> sp.<br>PCC 7376            | + | + | + | + | + | + | -        | - | - | - | - | + | + | + |
| <i>Limnothrix rosea</i>                        | + | + | + | + | + | + | -        | + | - | - | - | + | - | + |
| <i>Lyngbya aestuarii</i><br>BL J               | - | + | + | + | + | + | +        | + | - | + | - | + | - | + |
| <i>Lyngbya majuscula</i><br>3L                 | - | + | + | + | + | + | +        | + | - | - | - | + | - | - |
| <i>Lyngbya</i> sp. PCC<br>8106                 | - | + | + | + | + | + | +        | + | - | - | - | + | + | - |
| <i>Mastigocoleus</i><br><i>testarum</i>        | + | + | + | + | + | + | <b>F</b> | + | - | - | - | + | - | + |

|                                                   |   |   |   |   |   |   |          |          |   |   |   |   |   |   |
|---------------------------------------------------|---|---|---|---|---|---|----------|----------|---|---|---|---|---|---|
| <i>Microcoleus<br/>chthonoplastes</i> PCC<br>7420 | - | + | + | + | + | + | <b>F</b> | +        | - | + | - | + | - | + |
| <i>Microcoleus</i> sp.<br>PCC 7113                | + | + | + | + | + | + | -        | +        | - | - | - | + | + | + |
| <i>Microcoleus<br/>vaginatus</i> FGP-2            | + | + | + | + | + | + | -        | -        | - | - | - | + | - | + |
| <i>Microcystis<br/>aeruginosa</i> NIES-<br>843    | + | + | + | + | + | + | <b>F</b> | +        | - | - | - | + | + | - |
| <i>Microcystis<br/>aeruginosa</i> PCC<br>9443     | + | + | + | + | + | + | <b>F</b> | +        | - | - | - | + | + | - |
| <i>Microcystis<br/>aeruginosa</i> PCC<br>9806     | + | + | + | + | + | + | <b>F</b> | +        | - | - | - | + | - | - |
| <i>Nodosilinea<br/>nodulosa</i> PCC 7104          | + | + | + | + | + | + | <b>F</b> | <b>F</b> | - | + | + | + | - | + |
| <i>Nodularia<br/>spumigena</i><br>CCY9414         | + | + | + | + | + | + | -        | -        | - | - | - | + | - | + |
| <i>Nostoc azollae</i><br>0708                     | + | + | - | - | + | + | -        | -        | - | - | - | + | - | - |

|                                                           |   |   |   |   |   |   |          |   |   |   |   |   |   |   |
|-----------------------------------------------------------|---|---|---|---|---|---|----------|---|---|---|---|---|---|---|
| Nostoc<br>punctiforme PCC<br>73102                        | + | + | - | - | - | + | -        | - | - | + | + | + | - | + |
| <i>Nostoc</i> sp. PCC<br>7107                             | + | + | - | - | + | + | -        | - | - | - | - | + | - | + |
| <i>Nostoc</i> sp.<br>PCC7120                              | + | + | + | - | + | + | -        | + | - | + | + | + | - | + |
| <i>Nostoc</i> sp.<br>PCC7524                              | + | + | - | - | - | + | +        | + | - | + | - | + | - | + |
| <i>Oscillatoria</i><br><i>acuminata</i> PCC<br>6304       | + | + | + | + | + | + | -        | + | - | - | - | + | - | + |
| <i>Oscillatoria nigro-</i><br><i>viridis</i> PCC 7112     | + | + | + | + | + | + | -        | - | - | - | + | + | + | + |
| <i>Oscillatoria</i> sp. PCC<br>10802                      | + | + | - | - | + | + | <b>F</b> | + | - | - | - | + | - | - |
| <i>Oscillatoria</i> sp. PCC<br>6506                       | + | + | + | + | + | + | +        | + | - | - | - | + | - | + |
| <i>Prochlorococcus</i><br><i>marinus</i> str.<br>AS9601   | - | + | + | + | + | + | -        | - | - | - | + | - | - | - |
| <i>Prochlorococcus</i><br><i>marinus</i> str. MIT<br>9202 | - | + | + | + | + | + | -        | - | - | - | + | + | - | - |

|                                                           |   |   |   |   |   |   |   |   |   |   |   |   |   |   |
|-----------------------------------------------------------|---|---|---|---|---|---|---|---|---|---|---|---|---|---|
| <i>Prochlorococcus</i><br><i>marinus</i> str. MIT<br>9211 | - | + | + | + | + | + | - | - | - | - | + | - | - | - |
| <i>Prochlorococcus</i><br><i>marinus</i> str. MIT<br>9215 | - | + | + | + | + | + | - | - | - | - | + | - | - | - |
| <i>Prochlorococcus</i><br><i>marinus</i> str. MIT<br>9301 | - | + | + | + | + | + | - | - | - | - | + | - | - | - |
| <i>Prochlorococcus</i><br><i>marinus</i> str. MIT<br>9303 | - | + | + | + | + | + | - | - | - | - | - | - | - | - |
| <i>Prochlorococcus</i><br><i>marinus</i> str. MIT<br>9312 | - | + | + | + | + | + | - | - | - | - | + | - | - | - |
| <i>Prochlorococcus</i><br><i>marinus</i> str. MIT<br>9313 | - | + | + | + | + | + | - | - | - | - | - | - | - | - |
| <i>Prochlorococcus</i><br><i>marinus</i> str. MIT<br>9515 | - | + | + | + | + | + | - | - | - | - | + | - | - | - |
| <i>Prochlorococcus</i><br><i>marinus</i> str.<br>NATL1A   | - | + | + | + | + | + | - | - | - | - | + | - | - | - |

|                                                                                    |   |   |   |   |   |   |          |   |   |   |   |   |   |   |
|------------------------------------------------------------------------------------|---|---|---|---|---|---|----------|---|---|---|---|---|---|---|
| <i>Prochlorococcus</i><br><i>marinus</i> str.<br>NATL2A                            | - | + | + | + | + | + | -        | - | - | - | + | - | - | - |
| <i>Prochlorococcus</i><br><i>marinus</i> subsp.<br><i>marinus</i> str.<br>CCMP1375 | - | + | + | + | + | + | -        | - | - | - | + | - | - | - |
| <i>Planktothrix</i><br><i>paucivesiculata</i>                                      | + | + | + | + | + | + | -        | - | - | - | - | + | - | + |
| <i>Planktothrix</i><br><i>rubescens</i>                                            | + | + | + | + | + | + | <b>F</b> | + | - | - | - | + | - | + |
| <i>Planktothrix</i> <i>serta</i>                                                   | + | + | + | + | + | + | -        | + | - | - | - | + | - | + |
| <i>Pleurocapsa</i> sp.<br>PCC 7319                                                 | + | + | + | + | + | + | -        | - | - | + | - | + | + | + |
| <i>Pleurocapsa</i> sp.<br>PCC 7327                                                 | + | + | + | + | + | + | <b>F</b> | + | - | + | - | + | + | - |
| <i>Prochlorothrix</i><br><i>hollandica</i> PCC<br>9006                             | - | + | + | + | + | + | -        | - | - | - | - | + | - | - |
| <i>Richelia</i><br><i>intracellularis</i> HH01                                     | + | + | + | - | + | + | -        | - | - | - | - | + | - | - |
| <i>Richelia</i><br><i>intracellularis</i><br>HM01                                  | + | - | - | - | + | + | -        | - | - | - | - | + | - | - |



|                                                          |   |   |   |   |          |   |          |   |   |   |   |   |   |   |
|----------------------------------------------------------|---|---|---|---|----------|---|----------|---|---|---|---|---|---|---|
| <i>Rivularia</i> sp. PCC<br>7116                         | + | + | + | + | +        | + | -        | - | - | - | - | + | - | + |
| <i>Scytonema</i><br><i>tolypothrichoides</i><br>VB-61278 | + | + | + | + | +        | + | -        | - | - | - | - | + | - | + |
| <i>Stanieria</i><br><i>cyanosphaera</i> PCC<br>7437      | + | + | + | + | +        | + | -        | - | - | + | - | + | + | + |
| <i>Synechococcus</i><br><i>elongatus</i> PCC<br>7942     | + | + | + | + | +        | + | -        | - | - | - | - | + | - | - |
| <i>Synechococcus</i> sp.<br>1G10                         | - | + | + | + | +        | + | <b>F</b> | + | - | - | - | - | - | - |
| <i>Synechococcus</i> sp.<br>8F6                          | - | + | + | + | +        | + | -        | - | - | + | - | - | - | - |
| <i>Synechococcus</i> sp.<br>BL107                        | - | + | + | + | +        | - | -        | - | - | - | + | - | - | - |
| <i>Synechococcus</i> sp.<br>BO 8801                      | - | + | + | + | +        | + | <b>F</b> | + | - | - | + | + | - | - |
| <i>Synechococcus</i> sp.<br>CB0205                       | - | + | + | + | <b>F</b> | + | -        | - | - | + | - | - | - | - |
| <i>Synechococcus</i> sp.<br>CC9311                       | - | + | + | + | +        | + | +        | + | - | - | + | - | - | - |

|                                        |   |   |   |   |   |   |          |   |   |   |   |   |   |   |
|----------------------------------------|---|---|---|---|---|---|----------|---|---|---|---|---|---|---|
| <i>Synechococcus</i> sp.<br>CC9605     | - | + | + | + | + | - | -        | - | - | - | + | - | - | - |
| <i>Synechococcus</i> sp.<br>CC9902     | - | + | + | + | + | - | -        | - | - | - | + | - | - | - |
| <i>Synechococcus</i> sp.<br>MW101C3    | - | + | + | + | + | + | +        | + | - | - | + | + | - | - |
| <i>Synechococcus</i> sp.<br>NKBG15041c | + | + | + | + | + | + | -        | - | - | - | - | + | + | + |
| <i>Synechococcus</i> sp.<br>PCC7002    | + | + | + | + | + | + | -        | - | - | - | - | + | + | + |
| <i>Synechococcus</i> sp.<br>PCC7335    | + | + | + | + | + | + | <b>F</b> | + | - | + | + | + | - | + |
| <i>Synechococcus</i> sp.<br>RCC307     | - | + | + | + | + | - | -        | - | - | - | - | + | - | - |
| <i>Synechococcus</i> sp.<br>RS9916     | - | + | + | + | + | - | -        | - | - | - | - | - | - | - |
| <i>Synechococcus</i> sp.<br>RS9917     | - | + | + | + | + | + | <b>F</b> | + | - | - | + | + | - | - |
| <i>Synechococcus</i> sp.<br>WH 5701    | - | + | + | + | + | + | <b>F</b> | + | - | - | + | - | - | - |
| <i>Synechococcus</i> sp.<br>WH7803     | - | + | + | + | + | - | -        | - | - | - | + | + | - | - |
| <i>Synechococcus</i> sp.<br>WH7805     | - | + | + | + | + | - | -        | - | - | - | + | - | - | - |

|                                                     |   |   |   |   |   |   |          |   |   |   |   |   |   |   |
|-----------------------------------------------------|---|---|---|---|---|---|----------|---|---|---|---|---|---|---|
| <i>Synechococcus</i> sp.<br>WH8102                  | - | + | + | + | + | + | -        | - | - | - | + | - | - | - |
| <i>Synechococcus</i><br><i>spongiarum</i> 142       | - | + | + | + | - | - | -        | - | - | - | - | + | - | - |
| <i>Synechococcus</i><br><i>spongiarum</i> 15L       | - | + | + | + | - | - | -        | - | - | - | - | + | - | - |
| <i>Synechococcus</i><br><i>spongiarum</i> SP3       | - | + | + | + | - | + | -        | - | - | - | - | + | - | - |
| <i>Synechocystis</i> sp.<br>PCC6803                 | + | + | + | + | + | + | +        | + | - | - | - | + | + | + |
| <i>Synechocystis</i> sp.<br>PCC 7509                | + | + | + | + | + | + | -        | - | - | - | + | + | - | + |
| <i>Tolypothrix</i> sp.<br>PCC7601                   | + | + | - | - | - | + | <b>F</b> | + | - | - | + | + | - | + |
| <i>Trichodesmium</i><br><i>erythraeum</i><br>IMS101 | - | + | + | + | + | + | +        | + | - | - | - | + | - | - |
| <i>Xenococcus</i> sp.<br>PCC7305                    | + | + | + | + | + | + | <b>F</b> | + | - | - | - | + | + | + |

**Supplementary Table 3: Primers designed for the RT-qPCR.** The primer sequences targeting the genes under investigation: *ptr1*, a gene coding a Cyanobacterial FTR1 iron permease; *furA*, the gene coding the ferric uptake regulator and housekeeping gene, *rpoC1*, encoding the gamma subunit of the RNA polymerase in *Pseudanabaena* sp. PCC 7367. Additionally, a primer pair was designed for cytochrome c oxidase encoded by *cyoC*. The targeted gene locus, binding position from the start codon in bases, primer melting (T<sub>M</sub>) and annealing temperatures (T<sub>A</sub>) are also provided. The primer efficiencies were determined in a standard qPCR reaction using genomic DNA of *Pseudanabaena* sp. PCC7367 ranging from 10 000 000 copies to 1 copy of the targeted gene. All genes targeted were present in a single copy on the genome of *Pseudanabaena* sp. PCC7367.

| Target Gene                       | Binding position |      | Sequence 5' to 3'     | Product length [bases] | T <sub>M</sub> [°C] | T <sub>A</sub> [°C] | Amplification efficiency | Detection threshold |
|-----------------------------------|------------------|------|-----------------------|------------------------|---------------------|---------------------|--------------------------|---------------------|
| <i>ptr1</i><br>(Pse7367_RS12485)  | cFTR1 Fw         | 594  | CCGCATTATTACCCTGAGTAG | 55                     | 59                  | 54                  | 109,6%                   | 10 ng               |
|                                   | cFTR1 Rv         | 742  | AACGGGCATTGTATCCTG    |                        |                     |                     |                          |                     |
| <i>furA</i><br>(Pse7367_RS06445)  | furA Fw          | 82   | CGGGAAGTGATTCTGGATAC  | 55                     | 59                  | 54                  | 110,3%                   | 10 ng               |
|                                   | furA Rv          | 210  | CTTCACCGATCGATAGATGG  |                        |                     |                     |                          |                     |
| <i>rpoC1</i><br>(Pse7367_RS07505) | rpoC1 Fw         | 1382 | CAGCGTTTAATGCTGACTTTG | 55                     | 60                  | 55                  | 110,3%                   | 10 ng               |
|                                   | rpoC1 Rv         | 1530 | TTGGCTAGGCGTAATAATTGG |                        |                     |                     |                          |                     |
| <i>cyoC</i><br>(Pse7367_RS00935)  | cyoC Fw          | 152  | CAGCCTATCTTGCCTATCG   | 55                     | 59                  | 54                  | 106,1%                   | 100 ng              |
|                                   | cyoC Rv          | 368  | TGTCCGCCAATGAACAC     |                        |                     |                     |                          |                     |

#### **Supplementary Table 4a & b: Potential outer membrane porins encoded by *Pseudanabaena* sp. PCC7367**

The permeability of the Cyanobacterial outer membrane is significantly lower than that of the heterotrophic bacterium, *E. coli* (Kowata *et al.*, 2017; Qiu *et al.*, 2021 for a review), requiring additional transport systems to take up nutrients, including iron. *Synechocystis* porins play a role in inorganic ion transport (Qiu *et al.* 2018), with a specific iron transporting porin recently identified (Qiu *et al.* 2021). The constitutive expression of this open reading frame under varying iron conditions suggests that it plays a role in iron homeostasis in *Synechocystis* PCC 6803 (Qiu *et al.* 2021). While porin encoding genes are found in numerous Cyanobacterial genomes, the iron specific transporter was not identified in *Pseudanabaena* sp. PCC7367 (Qiu *et al.*, 2021). Additional potential outer membrane (OM) porins in *Pseudanabaena* PCC7367 were identified by their similarity to six putative iron porins in *Synechocystis* PCC6803 (Qiu *et al.* 2018). Screening of *Pseudanabaena* sp. PCC 7367 for the 6 putative porin genes identified in *Synechocystis* sp. PCC6803, by BLASTp (August 2021), yielded a total of 8 potential OM porins (Supplementary table 4b). The BLASTp hit with the highest percentage identity and an E-Value cut-off of 0,001 is listed in the 'Protein ID' column in Supplementary Table 4a. While all 8 OM porins identified in *Pseudanabaena* sp. PCC7367 are annotated as iron uptake porins, the putative OM porin WP\_015165725.1 encoded by PSE7367\_RS12540 in PCC7367 does not meet the parameters for an iron selective porin (highlighted in red in Supplementary Table 4a) as described by Qiu *et al.* (2021).

A

| Outer Membrane Porins                           |                    |             | <i>Pseudanabaena</i> sp. PCC 7367 |            |           |        |                    |                     |
|-------------------------------------------------|--------------------|-------------|-----------------------------------|------------|-----------|--------|--------------------|---------------------|
| Description                                     | Query Sequence     | ORF         | # Hits                            | % Ident.   | E Value   | Length | Protein ID         | ORF                 |
| Putative OM porins of <i>Synechocystis</i> 6803 | WP_01087334<br>4.1 | SGL_RS13040 | 8                                 | 40.16<br>% | 5.00E-107 | 545    | WP_01516<br>5725.1 | PSE7367_R<br>S12540 |
|                                                 | WP_01087221<br>3.1 | SGL_RS07085 | 8                                 | 35.52<br>% | 6.00E-94  | 545    | WP_01516<br>5725.1 | PSE7367_R<br>S12540 |
|                                                 | WP_01087425<br>2.1 | SGL_RS17810 | 8                                 | 39.84<br>% | 4.00E-102 | 545    | WP_01516<br>5725.1 | PSE7367_R<br>S12540 |
|                                                 | WP_01087402<br>9.1 | SGL_RS16575 | 8                                 | 56.85<br>% | 0.0       | 596    | WP_01516<br>5113.1 | PSE7367_R<br>S09305 |
|                                                 | WP_01087175<br>8.1 | SGL_RS04720 | 8                                 | 40.70<br>% | 6.00E-138 | 545    | WP_01516<br>5725.1 | PSE7367_R<br>S12540 |
|                                                 | WP_01087207<br>9.1 | SGL_RS06365 | 8                                 | 35.11<br>% | 1.00E-98  | 553    | WP_01516<br>3773.1 | PSE7367_R<br>S02420 |

B

| Protein Accession | ORF             | Length | Description       |
|-------------------|-----------------|--------|-------------------|
| WP_015165725.1    | PSE7367_RS12540 | 545    | iron uptake porin |
| WP_015163773.1    | PSE7367_RS02420 | 553    | iron uptake porin |
| WP_015165113.1    | PSE7367_RS09305 | 596    | iron uptake porin |
| WP_015164617.1    | PSE7367_RS06700 | 571    | iron uptake porin |
| WP_015166173.1    | PSE7367_RS14840 | 609    | iron uptake porin |
| WP_015164709.1    | PSE7367_RS07205 | 557    | iron uptake porin |
| WP_015164616.1    | PSE7367_RS06695 | 587    | iron uptake porin |
| WP_015166634.1    | PSE7367_RS17285 | 694    | iron uptake porin |

## References:

- Altschul, S. F. (1991) Amino acid substitution matrices from an information theoretic perspective. *J Mol Biol* 219:555–565.
- Altschul, S. F. (1993) A protein alignment scoring system sensitive at all evolutionary distances. *J Mol Evol.* 36:290–300.
- Brandt, A-M. *et al.* (2009) Transcriptional regulation and structural modeling of the FutC subunit of an ABC-type iron transporter in *Synechocystis* sp. strain PCC 6803. *Arch Microbiol.*191:561–570.
- Garber, A.I. *et al.* (2020) FeGenie: A Comprehensive Tool for the Identification of Iron Genes and Iron Gene Neighborhoods in Genome and Metagenome Assemblies. *Front. Microbiol.* 11:37.
- Jiang, H-B., *et al.* (2015): New insights into iron acquisition by cyanobacteria: an essential role for ExbB-ExbD complex in inorganic iron uptake. *ISME J* 9:297–309.
- Kanehisa, M., Goto, S. (2000) KEGG: Kyoto Encyclopedia of Genes and Genomes. *Nucleic Acids Res.* 28:27-30.
- Kanehisa, M., Sato, Y., Kawashima, M., Furumichi, M., and Tanabe, M. (2016) KEGG as a reference resource for gene and protein annotation. *Nucleic Acids Res.* 44:D457-D462.
- Katoh, H., Grossman, A.R., Hagino, N., Ogawa, T. (2000) A gene of *Synechocystis* sp. Strain PCC 6803 encoding a novel iron transporter. *J Bact.* 182:6523–6524.
- Katoh, H., Hagino, N., Grossman, A.R., Ogawa, T. (2001) Genes essential to iron transport in the cyanobacterium *Synechocystis* sp. strain PCC 6803. *J Bact.* 183:2779–2784.

- Kowata, H., Tochigi, S., Takahashi, H., Kojima, S. (2017) Outer Membrane Permeability of Cyanobacterium *Synechocystis* sp. Strain PCC 6803: Studies of Passive Diffusion of Small Organic Nutrients Reveal the Absence of Classical Porins and Intrinsically Low Permeability. *J Bacteriol.*199:e00371-17.
- Kranzler, C., *et al.* (2014) Coordinated transporter activity shapes high-affinity iron acquisition in cyanobacteria. *ISME J* 8:409–417.
- Morrissey, J., Bowler, C. (2012) Iron utilization in marine cyanobacteria and eukaryotic algae. In *Frontiers in microbiology* 3:43.
- Nevo, Y., Nelson, N. (2006) The NRAMP family of metal-ion transporters. *Biochim Biophys Acta* 1763:609–620.
- Qiu, G-W. *et al.* (2018) Outer Membrane Iron Uptake Pathways in the Model Cyanobacterium *Synechocystis* sp. Strain PCC 6803. *Appl Environ Microbiol.* 84: e01512-18.
- Qiu, G-W. *et al.* A unique porin mediates iron-selective transport through cyanobacterial outer membranes. *Environ Microbiol.* 23:376–390.
- Qiu, G-W., Koedooder, C., Qiu, B.S., Shaked, Y., Keren, N. (2021) Iron transport in cyanobacteria - from molecules to communities. *Trends Microbiol* S0966-842X (21)00133-5.
- Zhang, Z., Schwartz, S., Wagner, L., Miller, W. (2000) A greedy algorithm for aligning DNA sequences. *J Comput Biol.*7:203–214.
